# Supplementary material
Source: ML conference proceedings conference paper supplement (https://www.ecva.net/papers/eccv_2022/papers_ECCV/html/136730638_ECCV_2022_paper.php)
Supplement: Supplementary file 2 [file 136730638-supp.zip]

Archive with 3 entries (3 files):
- 1710-supp.pdf
- EgoGAN_1710_code.zip
- EgoGAN_1710_video.mp4
